# Supplementary material for: Effect of Intravenous Fluid Therapy for Acute Alcohol Intoxication on Length of Time from Arrival at the Emergency Department until Awakening: A Prospective Observational Cohort Study
Source: Research Square preprint supplement (doi:10.21203/rs.3.rs-183821/v1), 2021-02-05
Supplement: Supplementary file 1 [file 9b8c31b97df89bed06d5d02c.docx]

**Title page**

**Title**

Effect of Intravenous Fluid Therapy for Acute Alcohol Intoxication on Length of Time from Arrival at the Emergency Department until Awakening: A Prospective Observational Cohort Study

**Authors**

Takero Terayama 1,2, Ruka Sasa 1, Yuka Nakatani 3, Fumika Tanaka 1, Sho Terashige 1, Daishi Higashiyama 1, Takao Sugiura 1, Kosuke Hatanaka 1, Takashi Nishiyama 1, Shigeto Takeshima 1

**Affiliation**s

1 Department of Emergency, Self-Defense Forces Central Hospital, Setagaya, Tokyo, Japan

2 Department of Psychiatry, School of Medicine, National Defense Medical College, Tokorozawa, Saitama, Japan

3 Department of Health Informatics, Kyoto University School of Public Health, Kyoto, Japan

**Corresponding author**

Takero Terayama, M.D.

Department of Emergency, Self-Defense Forces Central Hospital, Ikeziri 1-2-24, Setagaya, Tokyo, Japan

E-mail: takero.for.medical.journal@gmail.com

Telephone: +81-3-3411-0151

Fax numbers: +81-3-3411-0151

ORCID: Takero Terayama, https://orcid.org/0000-0002-3002-5343

Table S1. Comparison of baseline characteristics of patients with acute alcohol intoxication who drink alcohol almost every day

| **Characteristics** | **Non-IVF** | **IVF** | ***p**** |
| --- | --- | --- | --- |
| *N* | 14 | 28 |  |
| Age (years) | 28 (IQR, 24) | 25.5 (IQR, 17) | 0.23 |
| Male sex | 10 (71.4%) | 21 (%75.0) | 0.80 |
| GCS score at the scene† k | 8 (IQR, 8) | 10 (IQR, 8) | 0.02 |
| No. of patients who arrived at the ED in the middle of night‡ | 8 (57.1%) | 20 (71.4%) | 0.36 |
| Systolic blood pressure (mmHg) | 102 (IQR, 17) | 112 (IQR, 17) | 0.03 |
| Heart rate (per min) | 83 (IQR, 13) | 80.5 (IQR, 13) | 0.68 |
| Initial GCS score in the ED | 14 (IQR, 5) | 9.5 (IQR, 6) | 0.55 |
| Blood gas analysis |  |  |  |
| pH | 7.35 (IQR, 0.09) | 7.33 (IQR, 0.04) | 0.03 |
| Base excess (mmol/L) | -3.0 (IQR, 3.3) | -2.1 (IQR, 2.0) | 0.86 |
| Hb (mg/dL) | 15.1 (IQR, 2.2) | 14.5 (IQR, 1.3) | 0.74 |
| BAC (mg/dL) | 248 (IQR, 86) | 281 (IQR, 111) | 0.34 |
| No. of patients who underwent head CT | 1 (7.1%) | 9 (32.1%) | 0.07 |
| No. of patients who used a sedative drug | 0 (0.0%) | 2 (7.1%) | 0.31 |
| No. of patients who were escorted by an adult§ | 7 (50.0%) | 17 (63.0%) | 0.42 |

IVF, intravenous fluid; IQR, interquartile range; GCS, Glasgow Coma Scale; ED, emergency department; Hb, hemoglobin; BAC, blood alcohol concentration; CT, computed tomography

*Chi-square or Mann–Whitney *U* test

†Measured by emergency service personnel

‡22:00–23:59 or 00:00–03:59

§Responsible and non-intoxicated adult who could take the patient home
